# Supplementary material for: Multifunctional Coating to Simultaneously Encapsulate Drug and Prevent Infection of Radiopaque Agent
Source: MDPI journal article supplement (doi:10.3390/ijms20092055), 2019-04-26
Supplement: s1 [file s1]

## Supplementary Materials

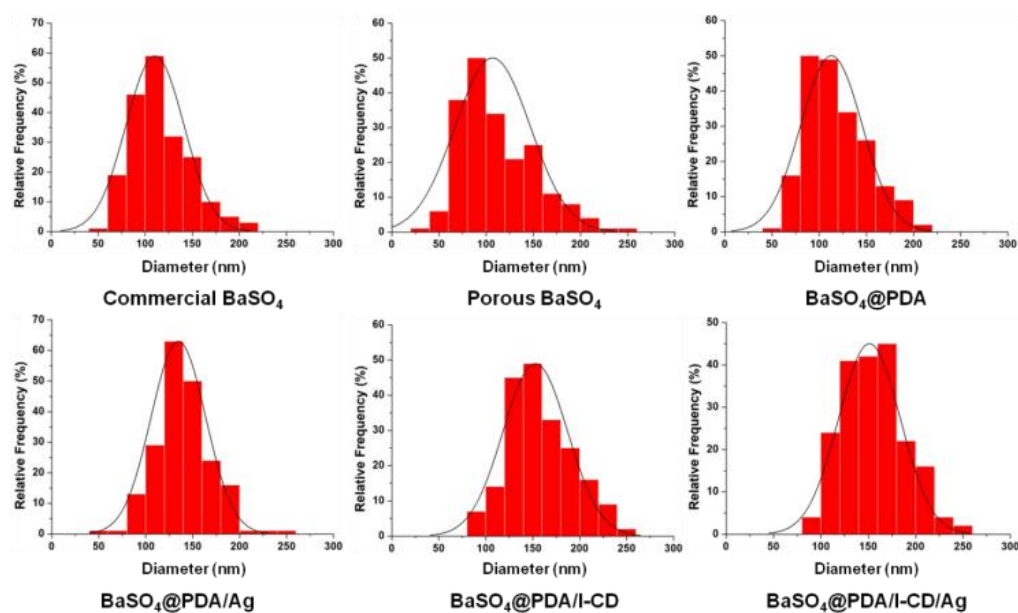

Figure S1. The diameter distribution of different microparticles.

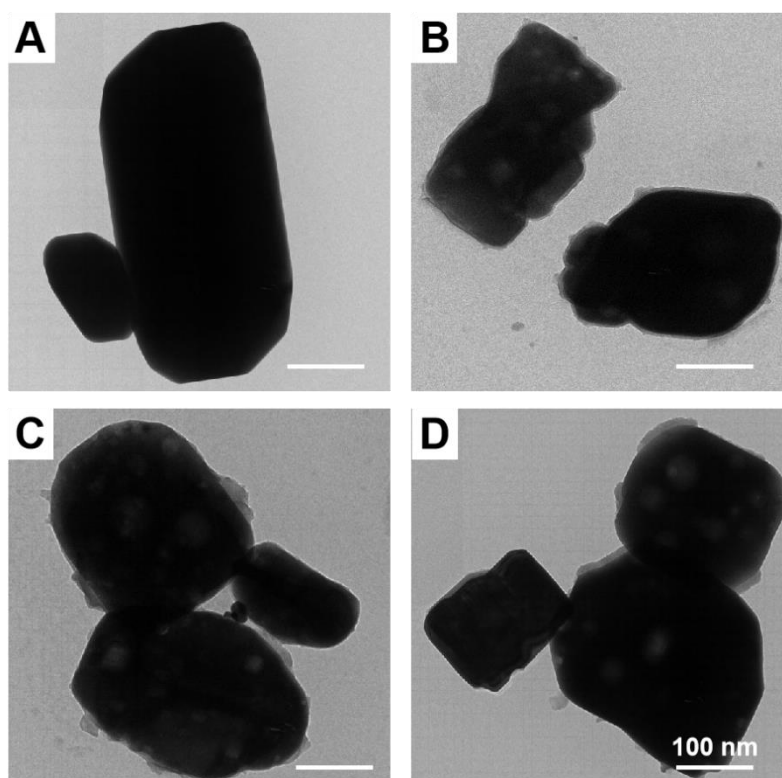

Figure S2. TEM images of (A)  $\text{BaSO}_4$ ; (B) porous  $\text{BaSO}_4@PDA$ ; (C) porous  $\text{BaSO}_4@PDA/Ag$  and (D) porous  $\text{BaSO}_4@PDA/I-CD/Ag$  microparticles.

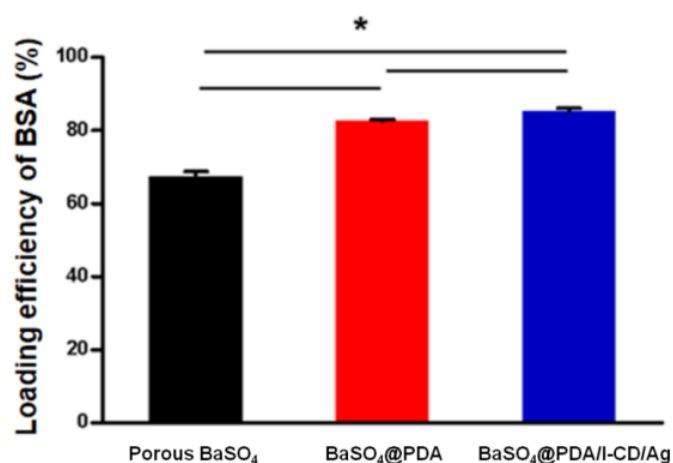

**Figure S3.** The loading efficiency of BSA in porous BaSO<sub>4</sub>, BaSO<sub>4</sub>@PDA and BaSO<sub>4</sub>@PDA/I-CD/Ag particles. \* $p < 0.05$ .

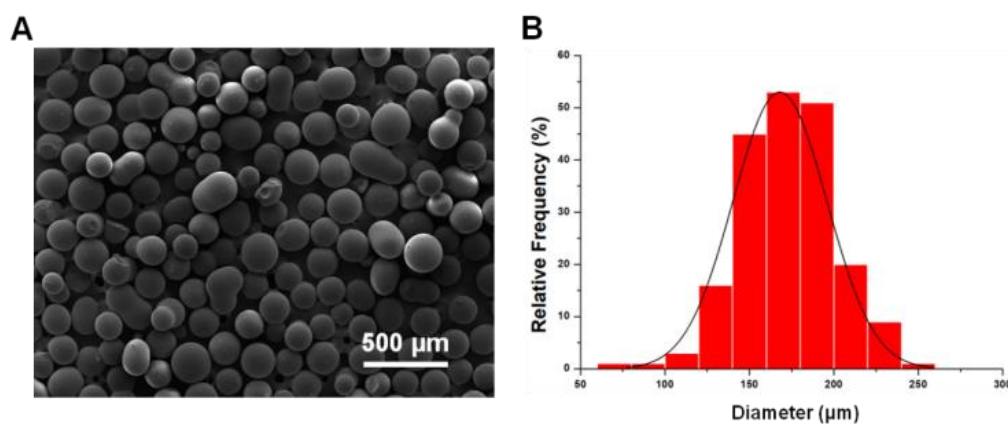

**Figure S4.** (A) SEM images of the PMMA for preparing bone cement. (B) The diameter distribution of PMMA particles.

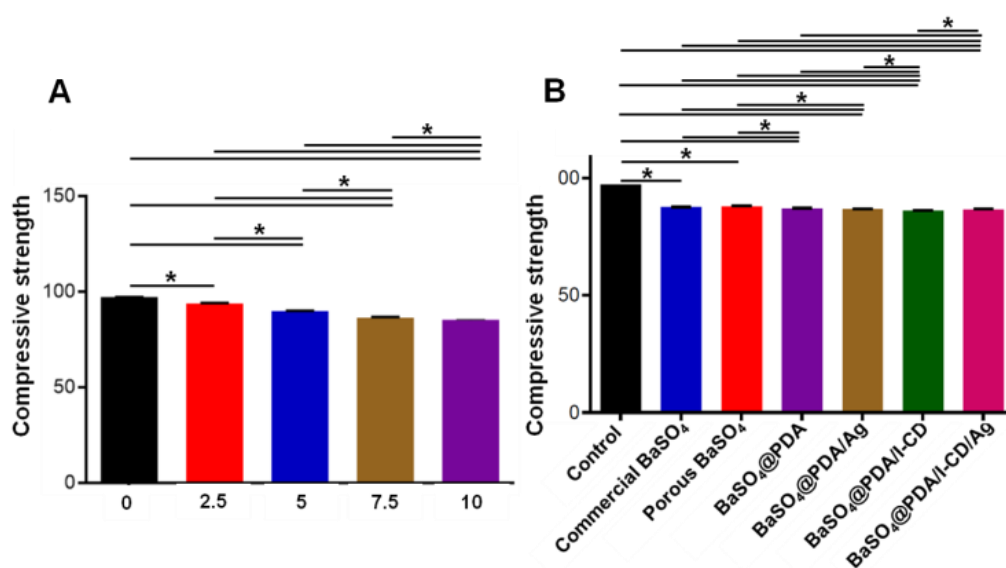

**Figure S5.** (A) Compressive strength of PMMA bone cements containing 0, 2.5 wt%, 5 wt%, 7.5 wt% and 10 wt% porous  $\text{BaSO}_4$ @PDA/I-CD/Ag microparticles. (B) Compressive strength of PMMA bone cement (Control) and PMMA bone cements adding 7.5 wt% commercial  $\text{BaSO}_4$ , porous  $\text{BaSO}_4$ ,  $\text{BaSO}_4$ @PDA,  $\text{BaSO}_4$ @PDA/Ag,  $\text{BaSO}_4$ @PDA/I-CD and  $\text{BaSO}_4$ @PDA/I-CD/Ag microparticles.  $*p < 0.05$ .

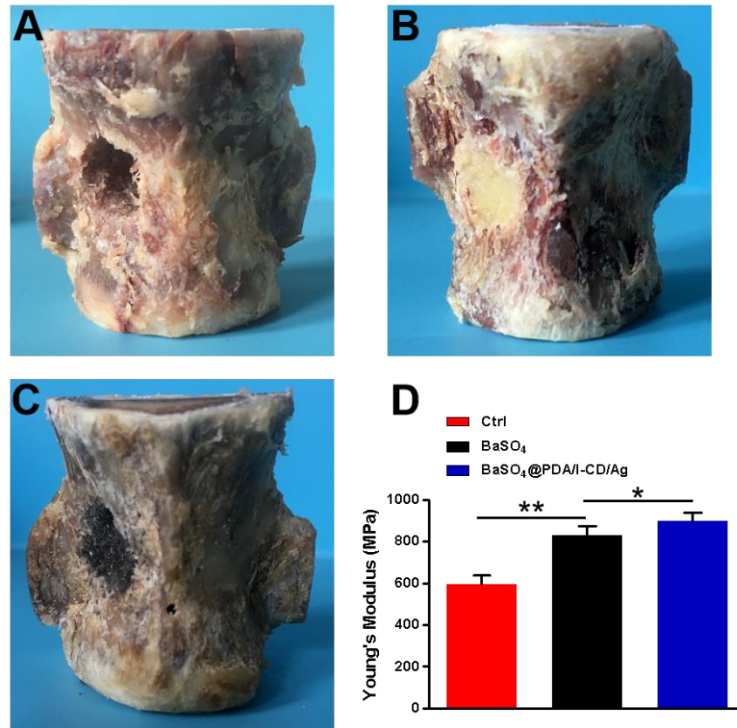

**Figure S6.** Images of sheep vertebral with defect as Ctrl group (A), and defects filled with PMMA bone cement containing commercial  $\text{BaSO}_4$  particles (B) and  $\text{BaSO}_4$ @PDA/I-CD/Ag particles (C). And Young's modulus of different groups (D).  $*p < 0.05$ .
